# Supplementary material for: Remote Evaluation of Parkinson's Disease Using a Conventional Webcam and Artificial Intelligence
Source: PubMed Central journal article supplement (PMC8733479; doi:10.3389/fneur.2021.742654), 2021-12-23
Supplement: Table_1.pdf [file Table_1.pdf]

**Supplementary Table 1. Model performance training for Parkinson's disease classification**

| Model performance                                 |                | LR           |              | NB           |              | RF           |              |
|---------------------------------------------------|----------------|--------------|--------------|--------------|--------------|--------------|--------------|
|                                                   |                | AUC          | ACC          | AUC          | ACC          | AUC          | ACC          |
| <b>Finger tapping</b>                             |                |              |              |              |              |              |              |
| Single hand<br>(unilateral)                       | Amplitude_mean | 0.545        | 0.538        | 0.399        | 0.461        | 0.476        | 0.482        |
|                                                   | Amplitude_std  | 0.351        | 0.405        | 0.355        | 0.438        | 0.471        | 0.481        |
|                                                   | Speed          | 0.550        | 0.535        | 0.569        | 0.518        | <b>0.673</b> | <b>0.614</b> |
|                                                   | Fatigue        | 0.369        | 0.415        | 0.521        | 0.468        | 0.503        | 0.497        |
| Two-hands<br>(bilateral)                          | Amplitude_mean | <b>0.634</b> | <b>0.567</b> | 0.506        | 0.531        | 0.402        | 0.44         |
|                                                   | Amplitude_std  | 0.346        | 0.401        | 0.434        | 0.479        | 0.359        | 0.401        |
|                                                   | Speed          | 0.427        | 0.465        | 0.433        | 0.409        | 0.528        | 0.509        |
|                                                   | Fatigue        | 0.597        | 0.588        | 0.532        | 0.536        | 0.522        | 0.509        |
| <b>Hand movements</b>                             |                |              |              |              |              |              |              |
| Single hand<br>(unilateral)                       | Amplitude_mean | 0.427        | 0.435        | 0.320        | 0.365        | 0.291        | 0.324        |
|                                                   | Amplitude_std  | <b>0.663</b> | <b>0.675</b> | <b>0.651</b> | <b>0.620</b> | <b>0.615</b> | <b>0.567</b> |
|                                                   | Speed          | <b>0.705</b> | <b>0.646</b> | 0.526        | 0.520        | 0.558        | 0.567        |
|                                                   | Fatigue        | 0.352        | 0.379        | 0.547        | 0.517        | 0.462        | 0.454        |
| Two-hands<br>(bilateral)                          | Amplitude_mean | 0.576        | 0.582        | <b>0.616</b> | <b>0.575</b> | 0.389        | 0.43         |
|                                                   | Amplitude_std  | <b>0.679</b> | <b>0.675</b> | <b>0.640</b> | <b>0.617</b> | 0.593        | 0.595        |
|                                                   | Speed          | 0.482        | 0.529        | 0.467        | 0.455        | 0.518        | 0.513        |
|                                                   | Fatigue        | <b>0.715</b> | <b>0.637</b> | <b>0.729</b> | <b>0.629</b> | <b>0.738</b> | <b>0.651</b> |
| <b>Pronation-supination movement of the hands</b> |                |              |              |              |              |              |              |
| Single hand<br>(unilateral)                       | Amplitude_mean | <b>0.692</b> | <b>0.636</b> | 0.587        | 0.525        | 0.553        | 0.535        |
|                                                   | Amplitude_std  | <b>0.793</b> | <b>0.709</b> | <b>0.807</b> | <b>0.745</b> | <b>0.807</b> | <b>0.715</b> |
|                                                   | Speed          | 0.486        | 0.507        | 0.467        | 0.469        | 0.481        | 0.507        |
|                                                   | Fatigue        | 0.497        | 0.514        | <b>0.620</b> | <b>0.561</b> | 0.449        | 0.444        |
| Two-hands<br>(bilateral)                          | Amplitude_mean | 0.486        | 0.494        | 0.437        | 0.464        | <b>0.605</b> | <b>0.603</b> |
|                                                   | Amplitude_std  | 0.590        | 0.545        | 0.525        | 0.556        | 0.489        | 0.495        |
|                                                   | Speed          | 0.340        | 0.385        | 0.533        | 0.560        | 0.409        | 0.444        |
|                                                   | Fatigue        | 0.594        | 0.573        | <b>0.617</b> | <b>0.565</b> | <b>0.786</b> | <b>0.732</b> |

Classification results of the combined right and left motor features for Parkinson's disease classification prediction. The training of the model was made using three classifiers: Logistic regression (LR), Gaussian Naïve-Bayes (NB) and Random Forest (RF). Features with cross-validation AUC > 0.6 are highlighted in bold. Units: Normalized amplitude[0-1] for finger tapping and hand movements; Amplitude (degrees) for pronation supination for amplitude features. Time (frames), for speed in all tasks. AUC, cross-validation area under curve; ACC; accuracy
