# Supplementary material for: Remote Evaluation of Parkinson's Disease Using a Conventional Webcam and Artificial Intelligence
Source: PubMed Central journal article supplement (PMC8733479; doi:10.3389/fneur.2021.742654), 2021-12-23
Supplement: Table_2.pdf [file Table_2.pdf]

**Supplementary Table 2. Model performance training for Parkinson’s disease classification in males**

| Model in males                                   |                | LR           |              | NB           |              | RF           |              |
|--------------------------------------------------|----------------|--------------|--------------|--------------|--------------|--------------|--------------|
|                                                  |                | AUC          | ACC          | AUC          | ACC          | AUC          | ACC          |
| <b>Finger tapping</b>                            |                |              |              |              |              |              |              |
| Single hand<br>(unilateral)                      | Amplitude_mean | 0.508        | 0.692        | 0.570        | 0.662        | 0.551        | 0.682        |
|                                                  | Amplitude_std  | <b>0.681</b> | <b>0.688</b> | 0.562        | 0.734        | 0.433        | 0.536        |
|                                                  | Speed          | <b>0.663</b> | <b>0.652</b> | <b>0.732</b> | <b>0.736</b> | <b>0.723</b> | <b>0.724</b> |
|                                                  | Fatigue        | 0.482        | 0.690        | 0.514        | 0.552        | 0.485        | 0.580        |
| Two-hands<br>(bilateral)                         | Amplitude_mean | 0.492        | 0.682        | 0.532        | 0.718        | 0.362        | 0.574        |
|                                                  | Amplitude_std  | <b>0.808</b> | <b>0.686</b> | <b>0.831</b> | <b>0.884</b> | <b>0.768</b> | <b>0.802</b> |
|                                                  | Speed          | 0.468        | 0.700        | 0.597        | 0.560        | 0.464        | 0.650        |
|                                                  | Fatigue        | <b>0.714</b> | <b>0.726</b> | <b>0.870</b> | <b>0.848</b> | <b>0.672</b> | <b>0.710</b> |
| <b>Hand movements</b>                            |                |              |              |              |              |              |              |
| Single hand<br>(unilateral)                      | Amplitude_mean | 0.523        | 0.700        | 0.267        | 0.580        | 0.421        | 0.564        |
|                                                  | Amplitude_std  | 0.268        | 0.698        | 0.277        | 0.608        | 0.422        | 0.536        |
|                                                  | Speed          | <b>0.754</b> | <b>0.674</b> | 0.473        | 0.726        | 0.283        | 0.556        |
|                                                  | Fatigue        | 0.185        | 0.718        | 0.248        | 0.544        | 0.404        | 0.594        |
| Two-hands<br>(bilateral)                         | Amplitude_mean | 0.448        | 0.696        | <b>0.630</b> | <b>0.568</b> | 0.553        | 0.584        |
|                                                  | Amplitude_std  | 0.457        | 0.696        | 0.382        | 0.590        | 0.212        | 0.580        |
|                                                  | Speed          | 0.406        | 0.706        | 0.543        | 0.576        | <b>0.641</b> | <b>0.708</b> |
|                                                  | Fatigue        | <b>0.779</b> | <b>0.706</b> | <b>0.623</b> | <b>0.640</b> | 0.580        | 0.676        |
| <b>Pronation-supination movement of the hand</b> |                |              |              |              |              |              |              |
| Single hand<br>(unilateral)                      | Amplitude_mean | <b>0.888</b> | <b>0.800</b> | <b>0.905</b> | <b>0.726</b> | <b>0.709</b> | <b>0.752</b> |
|                                                  | Amplitude_std  | <b>0.788</b> | <b>0.696</b> | <b>0.917</b> | <b>0.786</b> | <b>0.816</b> | <b>0.848</b> |
|                                                  | Speed          | 0.363        | 0.694        | 0.464        | 0.548        | 0.506        | 0.584        |
|                                                  | Fatigue        | 0.348        | 0.584        | <b>0.726</b> | <b>0.674</b> | 0.440        | 0.590        |
| Two-hands<br>(bilateral)                         | Amplitude_mean | <b>0.711</b> | <b>0.676</b> | <b>0.798</b> | <b>0.670</b> | <b>0.626</b> | <b>0.596</b> |
|                                                  | Amplitude_std  | 0.552        | 0.632        | <b>0.810</b> | <b>0.682</b> | 0.583        | 0.620        |
|                                                  | Speed          | 0.405        | 0.690        | <b>0.726</b> | <b>0.596</b> | 0.481        | 0.614        |
|                                                  | Fatigue        | 0.412        | 0.614        | <b>0.631</b> | <b>0.694</b> | <b>0.726</b> | <b>0.698</b> |

Classification results of the combined right and left motor features for Parkinson’s disease classification prediction. The training was made using three classifiers: Logistic regression (LR), Gaussian Naïve-Bayes (NB) and Random Forest (RF). Features with cross-validation AUC > 0.6 are highlighted in bold. Units: Normalized amplitude[0-1] for finger tapping and hand movements; Amplitude (degrees) for pronation supination for amplitude features. Time (frames), for speed in all tasks. AUC, cross-validation area under curve; ACC; accuracy
